# Supplementary material
Source: publisher figshare collection journal article supplement (https://acs.figshare.com/ndownloader/files/23213033)
Supplement: Supplementary file 1 [file 23213033]

## Supporting Information

### Eco-friendly production of fatty amides using 1-monoacylglycerols as acyl donors

Xiaosan Wang<sup>a,b,\*</sup>, Cong Jiang<sup>a</sup>, Xiaohan Wang<sup>a</sup>, Xiaowen Wang<sup>c</sup>, Qingzhe Jin<sup>a</sup>,  
Xingguo Wang<sup>a,\*</sup>

<sup>a</sup>National Engineering Research Center for Functional Food, Collaborative Innovation Center of Food Safety and Quality Control in Jiangsu Province, School of Food Science and Technology, Jiangnan University, 1800 Lihu Road, Wuxi, 214122, Jiangsu, P. R. China.

<sup>b</sup>Beijing Advanced Innovation Center for Food Nutrition and Human Health, Beijing Technology & Business University (BTBU), 11 Fucheng Road, 100048, Beijing, P.R. China.

<sup>c</sup>College of Food Science and Engineering, Shanxi Agriculture University, Taigu, 030801, Shanxi, P.R. China.

\* Corresponding Authors:

Xiaosan Wang, Ph.D., Associate Professor, Email address: [wxstongxue@163.com](mailto:wxstongxue@163.com)

Xingguo Wang, Ph.D., Professor, E-mail address: [wangxg1002@gmail.com](mailto:wangxg1002@gmail.com)

Tel.:+86 510 85876799; Fax: +86 510 85876799

Number of Pages: 10

Number of Figures: 9

Number of Tables: 0

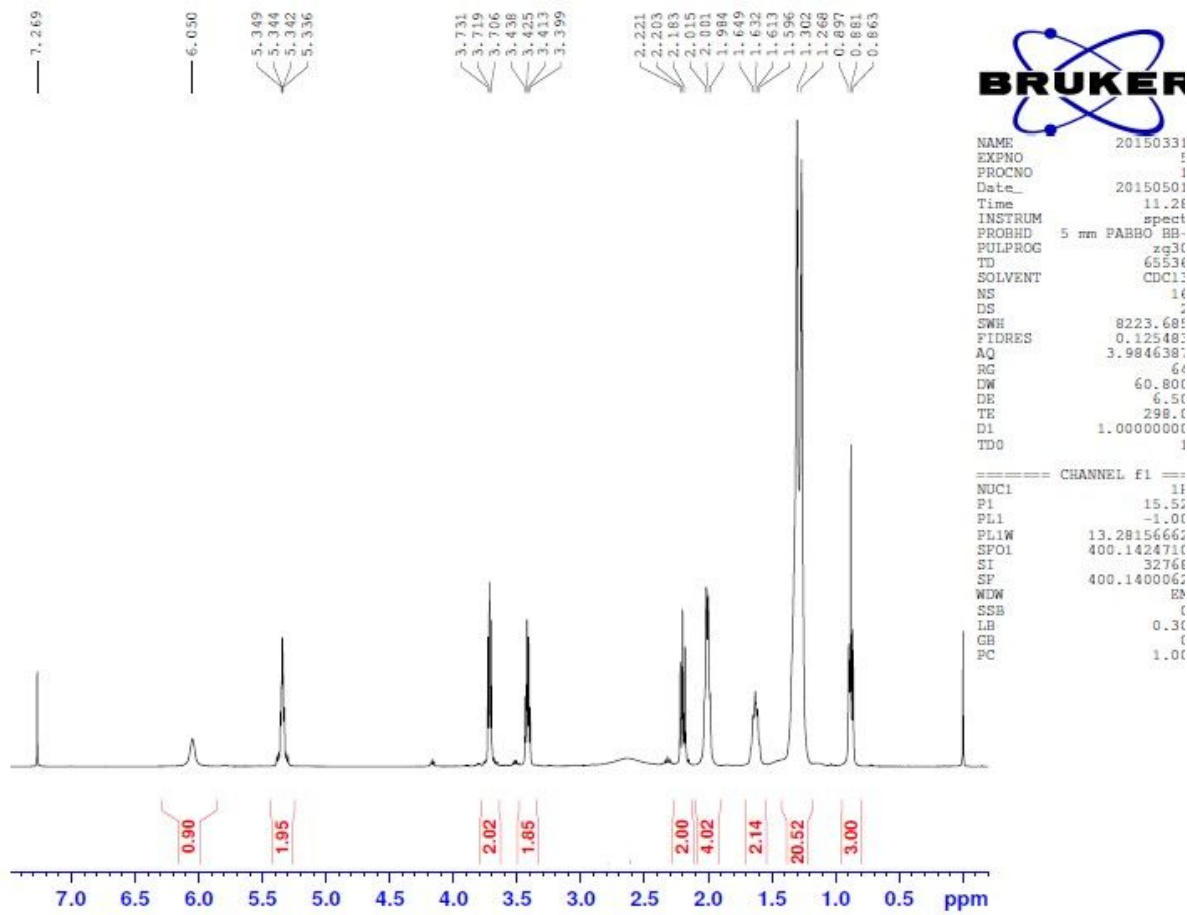

**Figure S1**  $^1\text{H}$  NMR spectrum of oleoyl ethanolamide

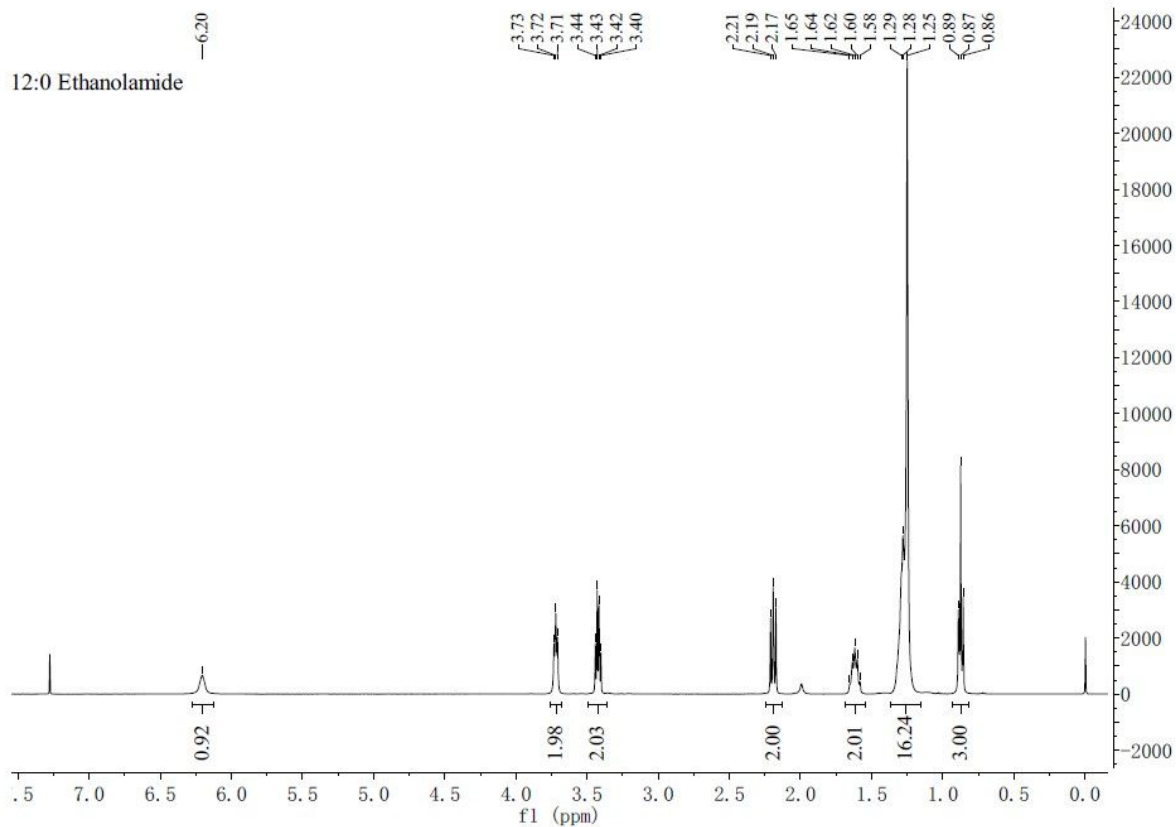

**Figure S2**  $^1\text{H}$  NMR spectrum of lauroyl ethanolamide

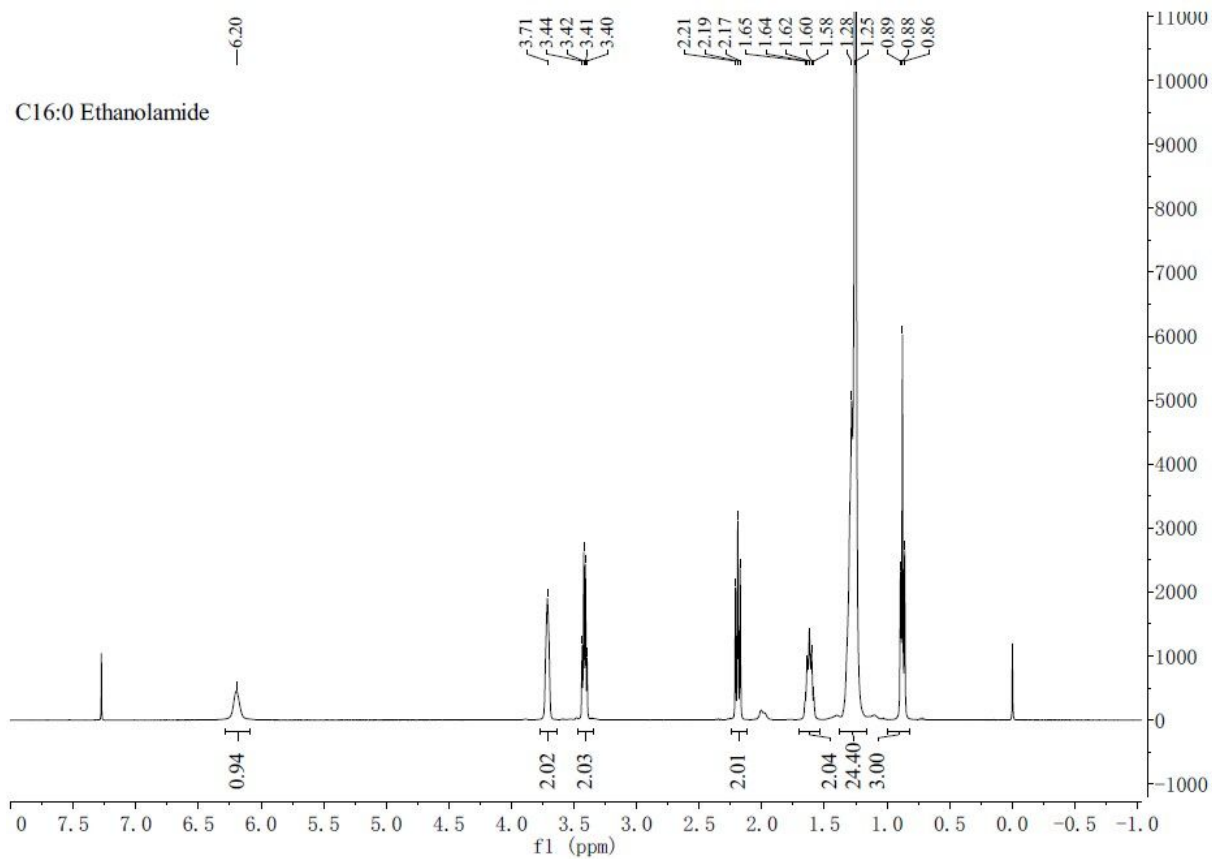

**Figure S3**  $^1\text{H}$  NMR spectrum of palmitoyl ethanolamide

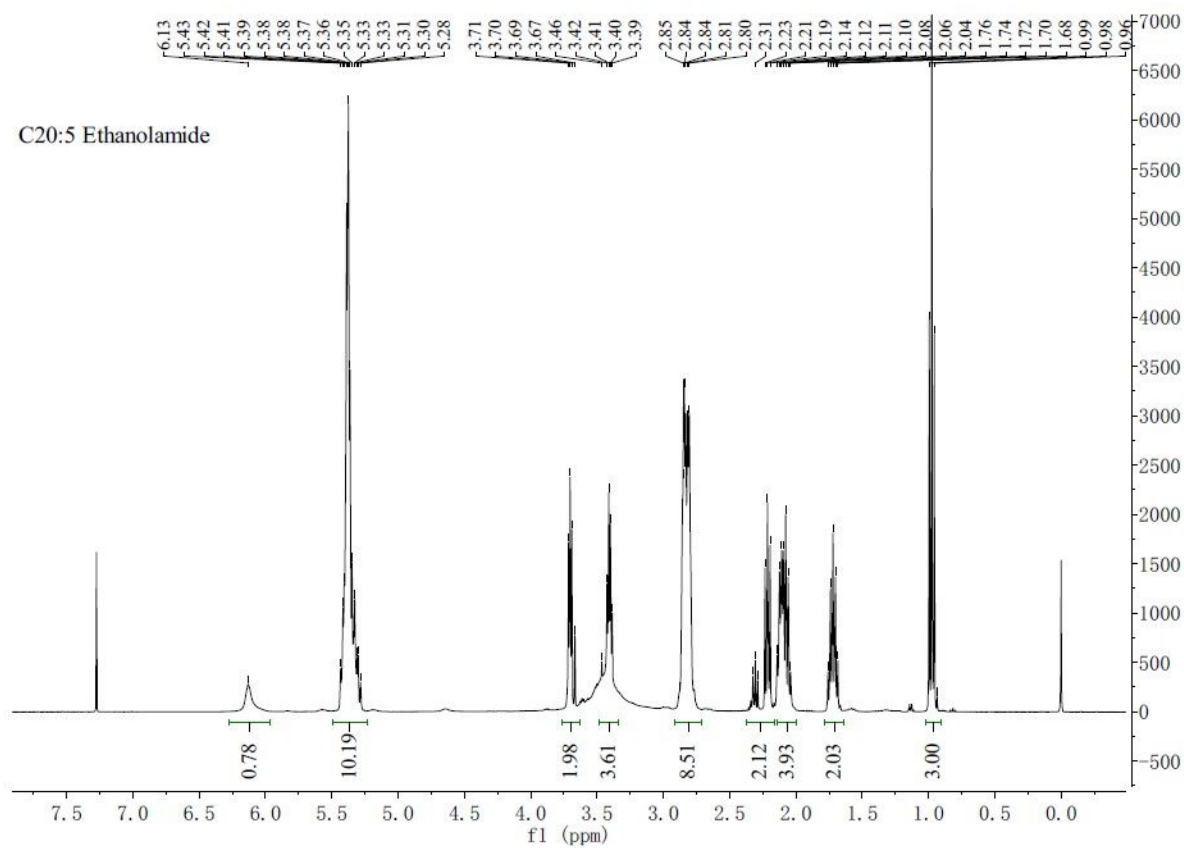

**Figure S4**  $^1\text{H}$  NMR spectrum of eicosapentaenoyl ethanolamide

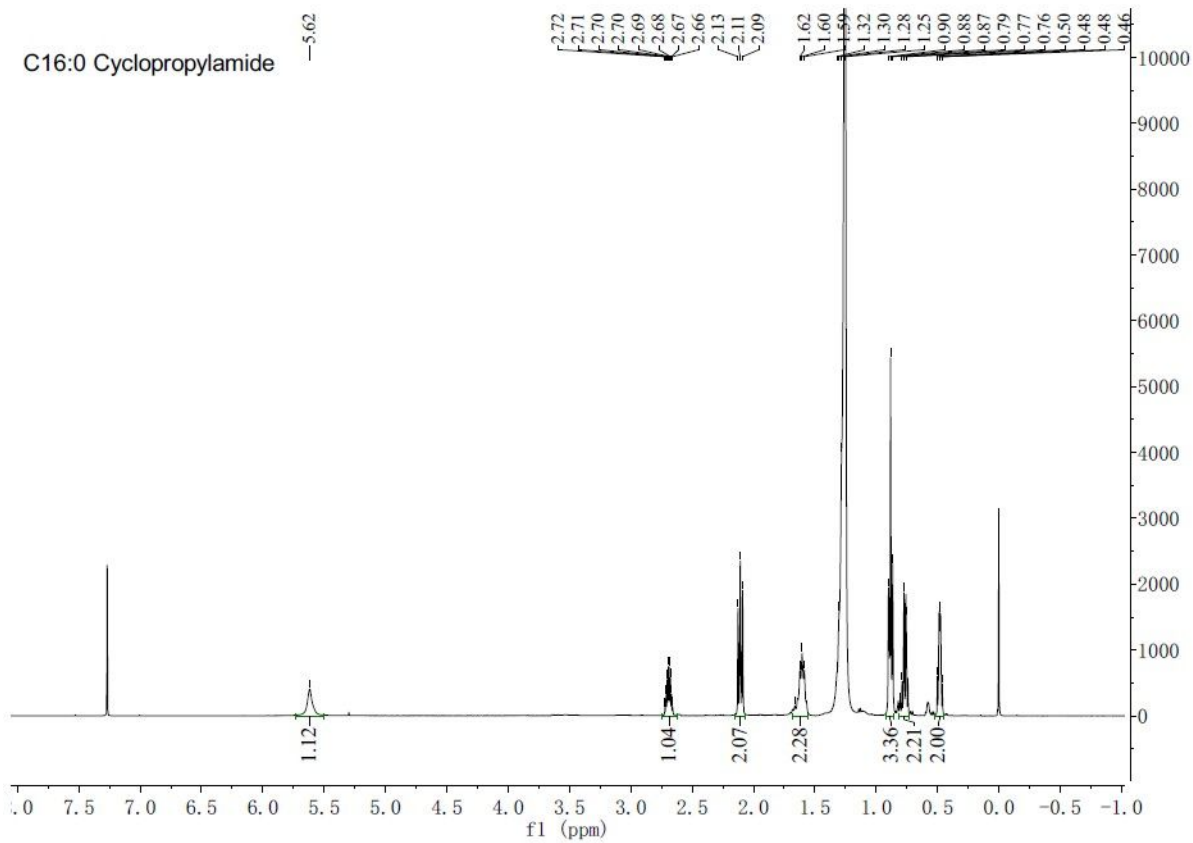

**Figure S5**  $^1\text{H}$  NMR spectrum of palmitoyl cyclopropylamide

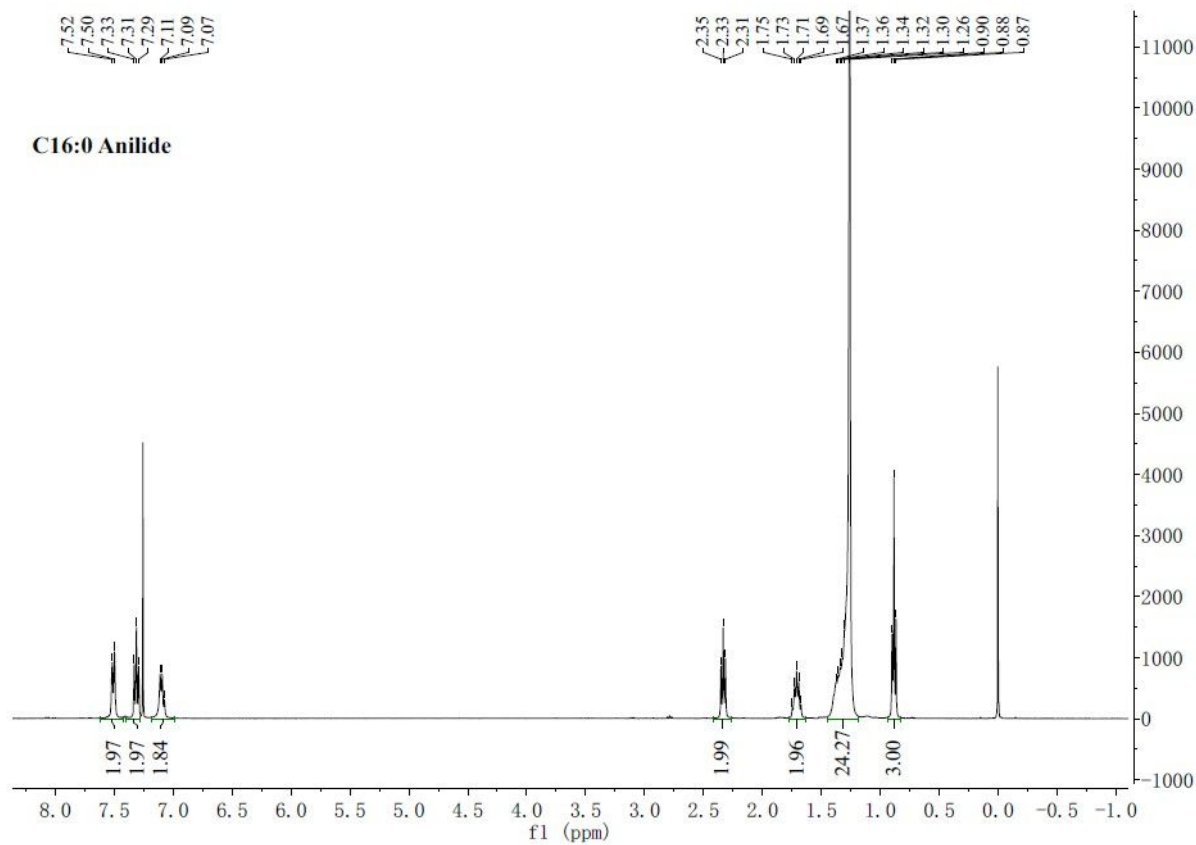

**Figure S6**  $^1\text{H}$  NMR spectrum of palmitoyl anilide

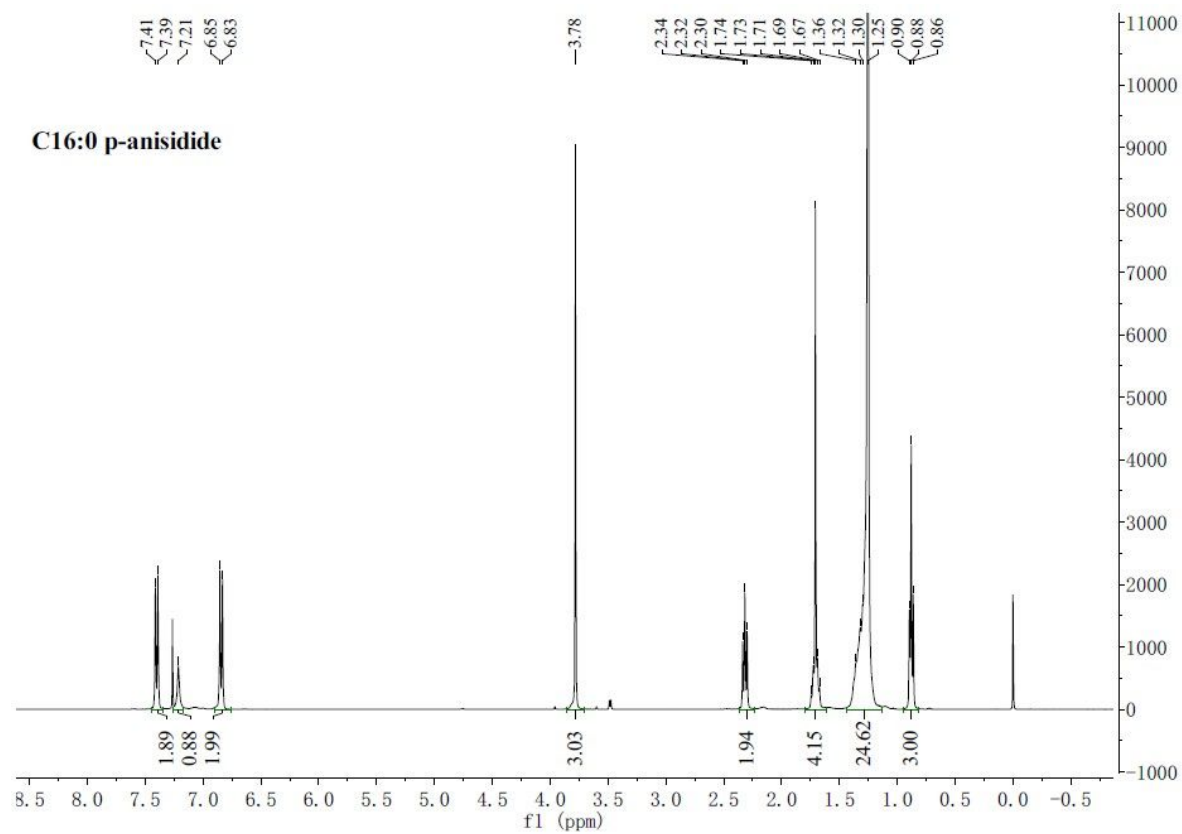

**Figure S7**  $^1\text{H}$  NMR spectrum of palmitoyl aniside



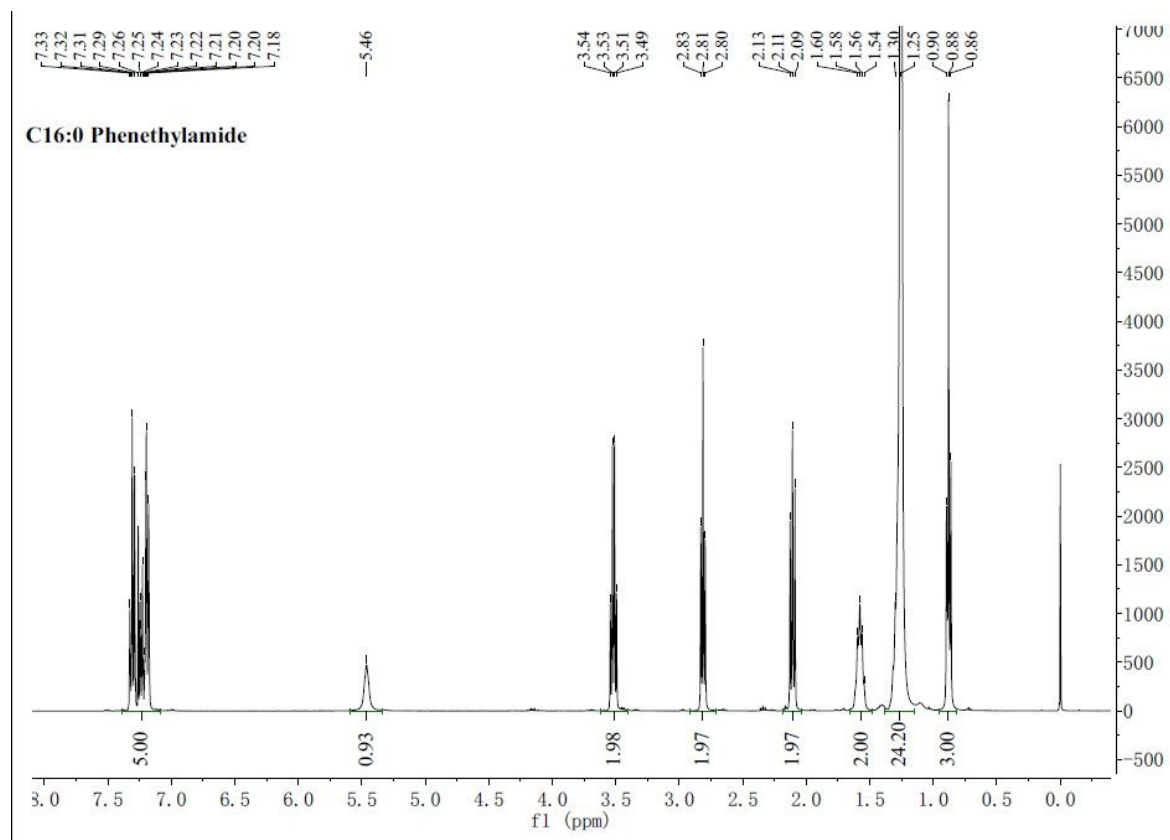

**Figure S8**  $^1\text{H}$  NMR spectrum of palmitoyl phenethylamide

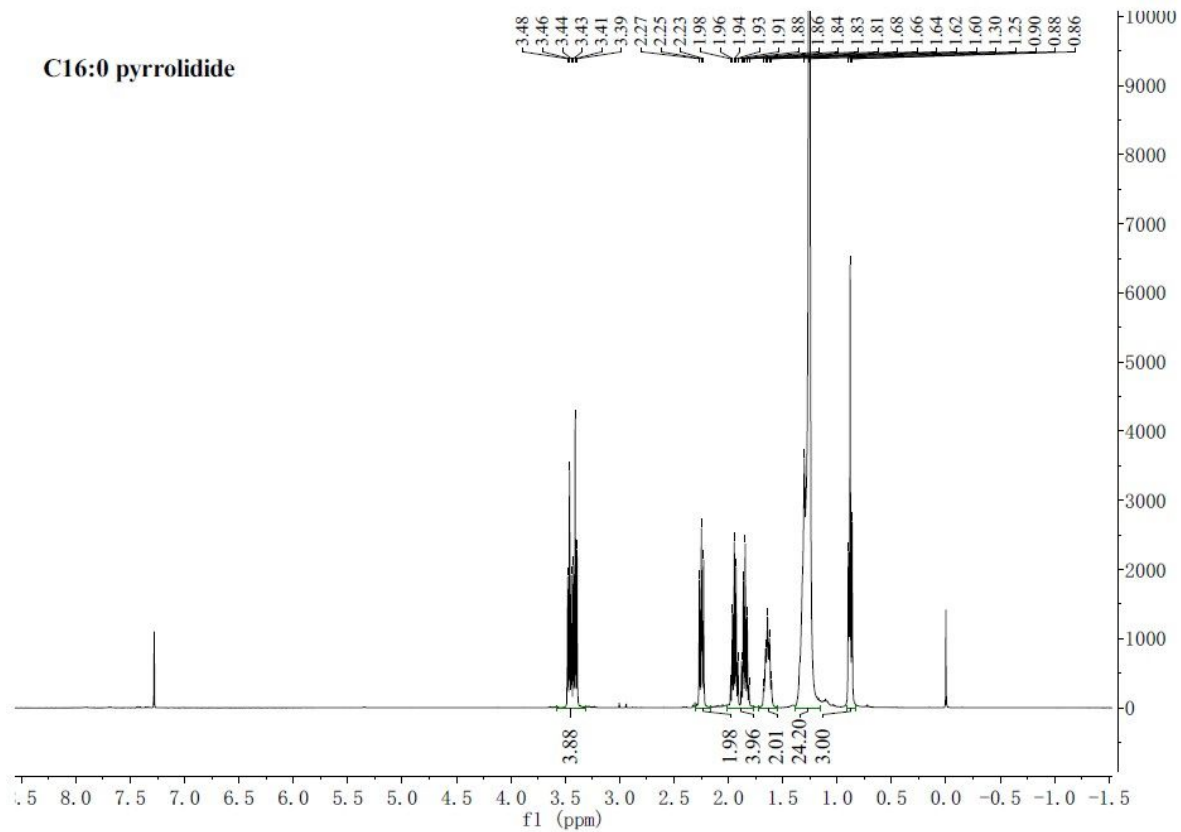

**Figure S9**  $^1\text{H}$  NMR spectrum of palmitoyl pyrrolidide
